# Supplementary material for: Antimicrobial s-PBC Coatings for Innovative Multifunctional Water Filters
Source: PubMed Central journal article supplement (PMC7664665; doi:10.3390/molecules25215196), 2020-11-08
Supplement: molecules-25-05196-s001.pdf [file molecules-25-05196-s001.pdf]

1 Supplementary materials

## 2 **Antimicrobial s-PBC coatings for innovative** 3 **multifunctional water filters.**

4 **Emanuele Luigi Sciuto<sup>a,1,§</sup>, Simona Filice<sup>a,§</sup>, Maria Anna Coniglio<sup>b</sup>, Giuseppina Faro<sup>c</sup>, Leon Gradon<sup>d</sup>, Clelia**  
5 **Galati<sup>e</sup>, Natalia Spinella<sup>e</sup>, Sebania Libertino<sup>a</sup> and Silvia Scalese<sup>a</sup>**

6 <sup>a</sup> Istituto per la Microelettronica e Microsistemi – Consiglio Nazionale delle Ricerche (CNR-IMM), Ottava Strada 5, 95121  
7 Catania, Italy;

8 <sup>b</sup> Department of Medical and Surgical Sciences and Advanced Technologies “G.F. Ingrassia”, University of Catania, Via  
9 Sofia 87, 95123 Catania, Italy;

10 <sup>c</sup> Azienda Sanitaria Provinciale di Catania, Via S. Maria La Grande 5, 95124 Catania, Italy.

11 <sup>d</sup> Faculty of Chemical and Process Engineering, Warsaw University of Technology, ul. Waryńskiego 1, 00-645 Warsaw,  
12 Poland

13 <sup>e</sup> ST Microelectronics, Stradale Primosole 50, 95121 Catania, Italy

14  
15 \*Corresponding authors: e.l.sciuto@gmail.com; simona.filice@imm.cnr.it

16

### 17 **Preparation of PP fibrous filters**

18 One of the most effective methods of production of fibrous depth filter is the melt-blown technique [Gradon  
19 et al., 2005]. The principle of production is shown in Fig. S1a. The granulated polymer placed in container (1)  
20 is transported with extrusion screw (2) and heated by an electric heater (3). Melted and homogenized polymer  
21 is pressed into the die (5). The rate of polymer flow is controlled by the gear system (4). The die is heated with  
22 hot air supplied from a compressor and air heater (6). The melted polymer is extruded through a row of  
23 nozzles of the die. Air nozzles surround the polymer nozzle and hot air flows along the polymer filaments.  
24 The tangential stress on the surface of the polymer filaments extend it causing reduction of the filament  
25 diameter to desired value. After solidification fibers are collected on the pivot (7), which rotates and moves  
26 back-and-forth to form a proper cartridge filter, Fig. S1b. Playing with process parameters a desired structure  
27 of the filter is obtained. The above method was used for production of fibrous layers for purpose of the paper  
28 and, in particular, the coupons used in the paper are cut out from such layers.

29

30

31

32

<sup>1</sup> Present address: Azienda Ospedaliero Universitaria Policlinico "G. Rodolico - San Marco", Via Santa Sofia 78, 95123 Catania, Italy.

<sup>§</sup> These authors contributed equally to the paper.



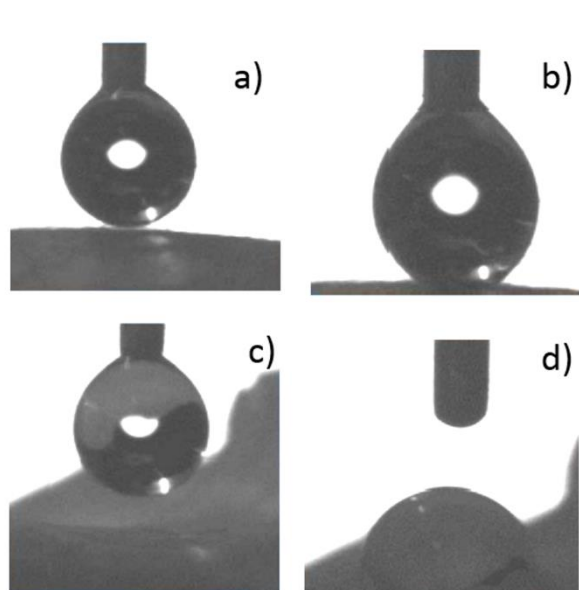

43  
44 **Figure S3.** Optical images of contact angle measurements for PP (a,b) and s-PBC@PP (c,d) filters.  
45  
46

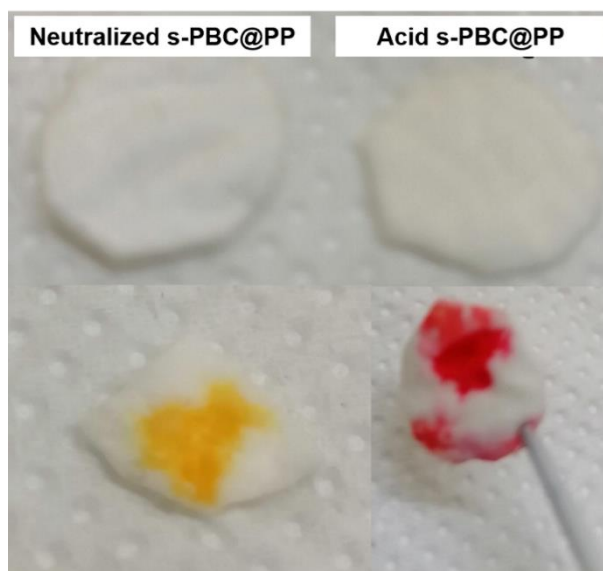

47  
48  
49 **Figure S4.** Photos of neutralized (on the left) and acid (on the right) s-PBC@PP coupons before (on the top) and  
50 after (on the bottom) being in contact with Methyl Orange.  
51

52 [1] L. Gradon, A.; Podgorski, A.; Balazy, A., Filtration of nanoparticles in the nanofibrous filters. FILTECH EUROPE,  
53 2005, 5, 178-185.  
54
